# Supplementary material for: Flexible graphene/silicon heterojunction solar cells
Source: Royal Society of Chemistry journal article supplement (doi:10.1039/c5ta03652f), 2015-01-01
Supplement: c5ta03652f1.pdf [file c5ta03652f1.pdf]

## Supporting Information

### Flexible Graphene/Silicon Heterojunction Solar Cells

*KaiqunRuan, Ke Ding, Yuming Wang, Senlin Diao, Zhibin Shao, Xiujuan Zhang,\*  
JianshengJie\**

Institute of Functional Nano& Soft Materials (FUNSOM), Collaborative Innovation Center of Suzhou Nano Science and Technology, Jiangsu Key Laboratory for Carbon-Based Functional Materials & Devices, Soochow University, Suzhou, Jiangsu 215123, P. R. China.

E-mail: jsjie@suda.edu.cn, xjzhang@suda.edu.cn

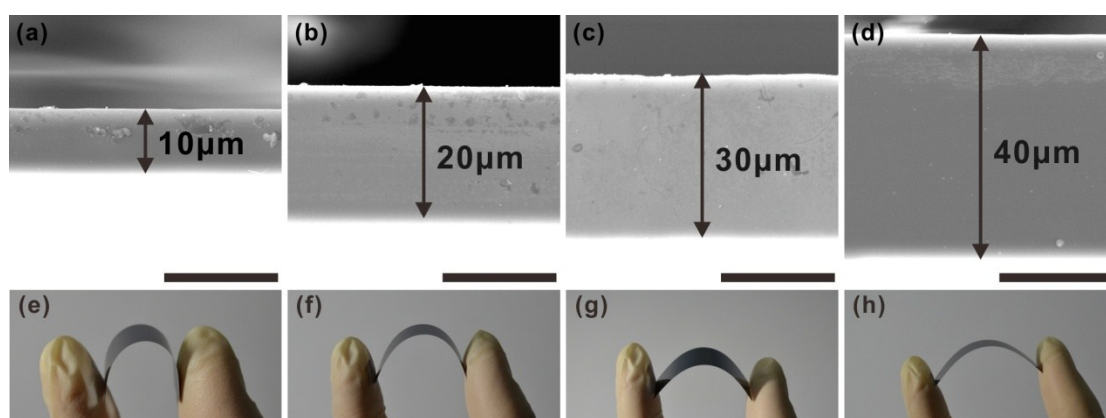

**Figure S1.** (a-d) Cross-sectional view SEM images of ultrathin c-Si substrates with different thickness. The scale bars are 20 μm. Corresponding photographs of the substrates under bending status are shown in (e-h).

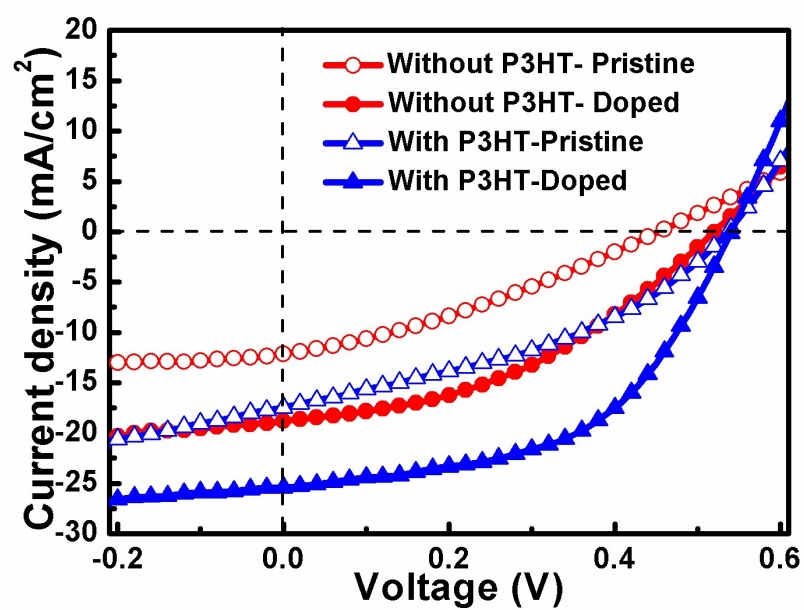

**Figure S2.**  $J$ - $V$  curves of a typical graphene (3-layer)/ c-Si (40  $\mu\text{m}$ ) solar cell with or without a P3HT electron blocking layer (10 nm).
